# Supplementary material for: Meteorin-like is an injectable peptide that can enhance regeneration in aged muscle through immune-driven fibro/adipogenic progenitor signaling
Source: PubMed Central journal article supplement (PMC9734561; doi:10.1038/s41467-022-35390-3), 2022-12-09
Supplement: 41467_2022_35390_MOESM3_ESM.pdf [file 41467_2022_35390_MOESM3_ESM.pdf]

Description of Additional Supplementary Files

**Supplementary Data 1.** Results of RNA sequencing data related to Supplementary figure 1a.
