# Supplementary material for: Meteorin-like is an injectable peptide that can enhance regeneration in aged muscle through immune-driven fibro/adipogenic progenitor signaling
Source: PubMed Central journal article supplement (PMC9734561; doi:10.1038/s41467-022-35390-3), 2022-12-09
Supplement: 41467_2022_35390_MOESM5_ESM.pdf [file 41467_2022_35390_MOESM5_ESM.pdf]

## Reporting Summary

Nature Portfolio wishes to improve the reproducibility of the work that we publish. This form provides structure for consistency and transparency in reporting. For further information on Nature Portfolio policies, see our [Editorial Policies](#) and the [Editorial Policy Checklist](#).

### Statistics

For all statistical analyses, confirm that the following items are present in the figure legend, table legend, main text, or Methods section.

- | n/a                                 | Confirmed                                                                                                                                                                                                                                                                                      |
|-------------------------------------|------------------------------------------------------------------------------------------------------------------------------------------------------------------------------------------------------------------------------------------------------------------------------------------------|
| <input type="checkbox"/>            | <input checked="" type="checkbox"/> The exact sample size ( $n$ ) for each experimental group/condition, given as a discrete number and unit of measurement                                                                                                                                    |
| <input type="checkbox"/>            | <input checked="" type="checkbox"/> A statement on whether measurements were taken from distinct samples or whether the same sample was measured repeatedly                                                                                                                                    |
| <input type="checkbox"/>            | <input checked="" type="checkbox"/> The statistical test(s) used AND whether they are one- or two-sided<br><i>Only common tests should be described solely by name; describe more complex techniques in the Methods section.</i>                                                               |
| <input checked="" type="checkbox"/> | <input type="checkbox"/> A description of all covariates tested                                                                                                                                                                                                                                |
| <input type="checkbox"/>            | <input checked="" type="checkbox"/> A description of any assumptions or corrections, such as tests of normality and adjustment for multiple comparisons                                                                                                                                        |
| <input type="checkbox"/>            | <input checked="" type="checkbox"/> A full description of the statistical parameters including central tendency (e.g. means) or other basic estimates (e.g. regression coefficient) AND variation (e.g. standard deviation) or associated estimates of uncertainty (e.g. confidence intervals) |
| <input type="checkbox"/>            | <input checked="" type="checkbox"/> For null hypothesis testing, the test statistic (e.g. $F$ , $t$ , $r$ ) with confidence intervals, effect sizes, degrees of freedom and $P$ value noted<br><i>Give <math>P</math> values as exact values whenever suitable.</i>                            |
| <input checked="" type="checkbox"/> | <input type="checkbox"/> For Bayesian analysis, information on the choice of priors and Markov chain Monte Carlo settings                                                                                                                                                                      |
| <input checked="" type="checkbox"/> | <input type="checkbox"/> For hierarchical and complex designs, identification of the appropriate level for tests and full reporting of outcomes                                                                                                                                                |
| <input checked="" type="checkbox"/> | <input type="checkbox"/> Estimates of effect sizes (e.g. Cohen's $d$ , Pearson's $r$ ), indicating how they were calculated                                                                                                                                                                    |

*Our web collection on [statistics for biologists](#) contains articles on many of the points above.*

### Software and code

Policy information about [availability of computer code](#)

Data collection

Data analysis

For manuscripts utilizing custom algorithms or software that are central to the research but not yet described in published literature, software must be made available to editors and reviewers. We strongly encourage code deposition in a community repository (e.g. GitHub). See the Nature Portfolio [guidelines for submitting code & software](#) for further information.

### Data

Policy information about [availability of data](#)

All manuscripts must include a [data availability statement](#). This statement should provide the following information, where applicable:

- Accession codes, unique identifiers, or web links for publicly available datasets
- A description of any restrictions on data availability
- For clinical datasets or third party data, please ensure that the statement adheres to our [policy](#)

Data availability statement is included in the manuscript text. Whole muscle mRNA sequencing data (Fig 4) has been deposited to GEO at number: GSE217037 (<https://www.ncbi.nlm.nih.gov/geo/query/acc.cgi?acc=GSE217037>). Single Cell RNA sequencing data (Fig 5) has been deposited to GEO at number: GSE217258

(<https://www.ncbi.nlm.nih.gov/geo/query/acc.cgi?acc=GSE217258>). All other related is available in accompanying source data files. Reactome database used can be accessed via [reactome.org](http://reactome.org). Gene Ontology database can be accessed via [geneontology.org](http://geneontology.org).

## Human research participants

Policy information about [studies involving human research participants and Sex and Gender in Research](#).

|                             |     |
|-----------------------------|-----|
| Reporting on sex and gender | N/A |
| Population characteristics  | N/A |
| Recruitment                 | N/A |
| Ethics oversight            | N/A |

Note that full information on the approval of the study protocol must also be provided in the manuscript.

## Field-specific reporting

Please select the one below that is the best fit for your research. If you are not sure, read the appropriate sections before making your selection.

Life sciences  Behavioural & social sciences  Ecological, evolutionary & environmental sciences

For a reference copy of the document with all sections, see [nature.com/documents/nr-reporting-summary-flat.pdf](https://nature.com/documents/nr-reporting-summary-flat.pdf)

## Life sciences study design

All studies must disclose on these points even when the disclosure is negative.

|                 |                                                                                                                                                                                                                                                                                                                                                                                                                                                    |
|-----------------|----------------------------------------------------------------------------------------------------------------------------------------------------------------------------------------------------------------------------------------------------------------------------------------------------------------------------------------------------------------------------------------------------------------------------------------------------|
| Sample size     | All animal study n's were determined by a prior power analyses to determine adequate sample sizes to achieve minimum B=0.80.                                                                                                                                                                                                                                                                                                                       |
| Data exclusions | No data were excluded from analyses once samples were collected. Rarely (<5%) mice died prematurely following BaCl <sub>2</sub> injections so could not reach experimental endpoints.                                                                                                                                                                                                                                                              |
| Replication     | All animal studies were performed using 3-8 biological replicates/individual mice (exact n noted in figure legends). For qPCR analyses, each biological replicate was analyzed in technical triplicate. For tissue culture, each experiment was repeated in three independent replicates. For flow cytometry, each biological sample was analyzed for minimum 10,000 singlet gated cells. All attempts at replication experiments were successful. |
| Randomization   | All young mice were used as controls. All old mice were randomly distributed between old-control and old-experimental groups prior to the onset of experimentation. For heterochronic parabiosis, mice were prescreened by animal surgeon to best match body sizes of paired mice.                                                                                                                                                                 |
| Blinding        | Samples were coded upon collection through analysis and decoded after quantitation for flow cytometry, force measurements and molecular assays. For histological analysis, images were coded and quantified either by blinded technician or unbiased macro script.                                                                                                                                                                                 |

## Reporting for specific materials, systems and methods

We require information from authors about some types of materials, experimental systems and methods used in many studies. Here, indicate whether each material, system or method listed is relevant to your study. If you are not sure if a list item applies to your research, read the appropriate section before selecting a response.

### Materials & experimental systems

| n/a                                 | Involvement in the study                                        |
|-------------------------------------|-----------------------------------------------------------------|
| <input type="checkbox"/>            | <input checked="" type="checkbox"/> Antibodies                  |
| <input checked="" type="checkbox"/> | <input type="checkbox"/> Eukaryotic cell lines                  |
| <input checked="" type="checkbox"/> | <input type="checkbox"/> Palaeontology and archaeology          |
| <input type="checkbox"/>            | <input checked="" type="checkbox"/> Animals and other organisms |
| <input checked="" type="checkbox"/> | <input type="checkbox"/> Clinical data                          |
| <input checked="" type="checkbox"/> | <input type="checkbox"/> Dual use research of concern           |

### Methods

| n/a                                 | Involvement in the study                           |
|-------------------------------------|----------------------------------------------------|
| <input checked="" type="checkbox"/> | <input type="checkbox"/> ChIP-seq                  |
| <input type="checkbox"/>            | <input checked="" type="checkbox"/> Flow cytometry |
| <input checked="" type="checkbox"/> | <input type="checkbox"/> MRI-based neuroimaging    |

## Antibodies

|                 |                                                                                                                                                                                                                                                                                                                                                                                                                                                                                                                                                                                          |
|-----------------|------------------------------------------------------------------------------------------------------------------------------------------------------------------------------------------------------------------------------------------------------------------------------------------------------------------------------------------------------------------------------------------------------------------------------------------------------------------------------------------------------------------------------------------------------------------------------------------|
| Antibodies used | Antibodies used include the following: APC anti-mouse CD45 (1:200, Biolegend 157605), APC anti-mouse CD11b (1:200, Biolegend, 101211), PE anti-mouse CD106 (1:50, VCAM, Biolegend 105713), FITC anti-mouse Ly6A/E (SCA1, 1:50, Biolegend, 108105), Pacific Blue anti-mouse Ly6C (1:200, Biolegend, 128013), AlexaFluoro 488 anti-mouse CD170 (SiglecF, 1:200, Biolegend 155524), AlexaFluoro 488 anti-mouse Ly6G (1:200, Biolegend 127626), APC anti mouse F4/80 (1:200, Biolegend 123116), Pacific Blue AnnexinV (Biolegend 640926), PE-Cy7 anti-mouse CD11b (1:200, Biolegend 101216). |
| Validation      | All antibodies were validated by manufacturer and each lot is quality control tested for flow cytometric analysis. From manufacturer: "Each lot product is validated by QC testing with a series of titration dilutions."                                                                                                                                                                                                                                                                                                                                                                |

## Animals and other research organisms

Policy information about [studies involving animals](#); [ARRIVE guidelines](#) recommended for reporting animal research, and [Sex and Gender in Research](#)

|                         |                                                                                                                                                                                                                                                                                                                       |
|-------------------------|-----------------------------------------------------------------------------------------------------------------------------------------------------------------------------------------------------------------------------------------------------------------------------------------------------------------------|
| Laboratory animals      | mus musculus (C57/bl6j) mice were used for these experiments. Mice were provided by NIA and used for young groups at 3-4months age and used for old grouping at 24-27 months age. 3-4 month old Metrnl-/- mice (similar B56 background) were used for transgenic experiments as described in the animal methods.      |
| Wild animals            | No wild animals were used in this study.                                                                                                                                                                                                                                                                              |
| Reporting on sex        | The response to muscle injury in expression of Metrnl mRNA was no different in male vs female mice. We maintained sex as a control throughout most of the experimentation (males) with the exception for heterochronic parabiosis studies which used only females in order to reduce fighting after surgical pairing. |
| Field-collected samples | No field-collected samples were used in this study.                                                                                                                                                                                                                                                                   |
| Ethics oversight        | All animal experiments and care followed the guidelines and were approved by the Institutional Animal Care and Use Committee at Duke Medical Center.                                                                                                                                                                  |

Note that full information on the approval of the study protocol must also be provided in the manuscript.

## Flow Cytometry

### Plots

Confirm that:

- The axis labels state the marker and fluorochrome used (e.g. CD4-FITC).
- The axis scales are clearly visible. Include numbers along axes only for bottom left plot of group (a 'group' is an analysis of identical markers).
- All plots are contour plots with outliers or pseudocolor plots.
- A numerical value for number of cells or percentage (with statistics) is provided.

### Methodology

|                           |                                                                                                                                                                                                                                                                                                                                                                                                                                                     |
|---------------------------|-----------------------------------------------------------------------------------------------------------------------------------------------------------------------------------------------------------------------------------------------------------------------------------------------------------------------------------------------------------------------------------------------------------------------------------------------------|
| Sample preparation        | The majority of the flow cytometry experiments were performed on mouse tibialis anterior muscles that were dissected, digested using collagenase solution, filtered, stained with antibodies and analyzed by flow cytometry.                                                                                                                                                                                                                        |
| Instrument                | Sony MA900                                                                                                                                                                                                                                                                                                                                                                                                                                          |
| Software                  | Sony MA900 cell sorting software was used for initial analysis and data collection. data were exported as FCS 3.0 files and analyzed using FlowJo software.                                                                                                                                                                                                                                                                                         |
| Cell population abundance | When cell sorting was performed, a post sort analysis was performed on ~100 cells to verify >95% purity of sorted populations).                                                                                                                                                                                                                                                                                                                     |
| Gating strategy           | Gating strategy for all flow cytometry began by identifying cells using FSC-A and BSC-A channels and then FSC-H by FSC-A correlation. Specific Gating strategy for macrophage populations is displayed in Figure 3B. Specific gating strategy for FAPs is displayed in Supplemental figure 5 A. Fluorescence minus one controls were used to set gates. Fluorescence minus one controls for each gating strategy are shown in supplemental figures. |

- Tick this box to confirm that a figure exemplifying the gating strategy is provided in the Supplementary Information.
